# Supplementary material for: Exploring Solanum tuberosum Epoxide Hydrolase Internal Architecture by Water Molecules Tracking
Source: MDPI journal article supplement (doi:10.3390/biom8040143), 2018-11-12
Supplement: s1 [file s1]

| ID       | ALL            | p(ALL)         | IN           | p(IN)          | OUT          | p(OUT)         |
|----------|----------------|----------------|--------------|----------------|--------------|----------------|
| TM1      | $1893 \pm 158$ | $92.1 \pm 7.7$ | $940 \pm 84$ | $47.8 \pm 4.1$ | $954 \pm 84$ | $48.4 \pm 4.1$ |
| TC/M     | $139 \pm 28$   | $6.8 \pm 1.4$  | $76 \pm 9$   | $3.9 \pm 0.4$  | $63 \pm 10$  | $3.2 \pm 0.5$  |
| TM2      | $22 \pm 23$    | $1.1 \pm 1.1$  | $11 \pm 12$  | $0.5 \pm 0.6$  | $11 \pm 13$  | $0.6 \pm 0.7$  |
| outliers | $2 \pm 1$      | $< 0.1$        | $1 \pm 2$    | $< 0.1$        | $1 \pm 1$    | $< 0.1$        |
