# Supplementary material for: Exploring Solanum tuberosum Epoxide Hydrolase Internal Architecture by Water Molecules Tracking
Source: MDPI journal article supplement (doi:10.3390/biom8040143), 2018-11-12
Supplement: s1 [file s1]

| Beginning | End  | MD1 | MD2 | MD3 | MD4 | MD5 | SUM  | [%]  |
|-----------|------|-----|-----|-----|-----|-----|------|------|
| TM1       | TM1  | 797 | 931 | 750 | 907 | 904 | 4289 | 81.7 |
| TM1       | TC/M | 61  | 45  | 45  | 50  | 60  | 261  | 5.0  |
| TC/M      | TM1  | 65  | 64  | 53  | 49  | 90  | 321  | 6.1  |
| TM1       | TM2  | 28  | 4   | 6   | 7   | 4   | 49   | 0.9  |
| TM2       | TM1  | 25  | 3   | 9   | 8   | 2   | 47   | 0.9  |
| TM1       | N    | 23  | 19  | 14  | 18  | 23  | 97   | 1.8  |
| N         | TM1  | 25  | 24  | 21  | 17  | 21  | 108  | 2.1  |
| TC/M      | TC/M | 7   | 7   | 4   | 13  | 14  | 45   | 0.9  |
| TC/M      | TM2  | 4   | 1   |     |     | 1   | 6    | 0.1  |
| TM2       | TC/M | 3   |     |     | 1   |     | 4    | 0.1  |
| TC/M      | N    | 1   | 2   | 3   |     | 3   | 9    | 0.2  |
| N         | TC/M |     | 1   |     | 2   | 1   | 4    | 0.1  |
| TM2       | TM2  | 1   |     |     |     |     | 1    | <0.1 |
| TM2       | N    | 1   |     |     |     |     | 1    | <0.1 |
| N         | TM2  |     |     | 1   |     |     | 1    | <0.1 |
| TM1       | OUT  | 1   |     | 1   | 1   |     | 3    | 0.1  |
| OUT       | TM1  |     | 1   |     | 2   |     | 3    | 0.1  |
| N         | N    |     |     | 1   |     |     | 1    | <0.1 |
| OUT       | N    |     | 1   |     | 1   |     | 2    | <0.1 |
