# Supplementary material for: Exploring Solanum tuberosum Epoxide Hydrolase Internal Architecture by Water Molecules Tracking
Source: MDPI journal article supplement (doi:10.3390/biom8040143), 2018-11-12
Supplement: s1 [file s1]

| Variant                             | Stability effect  | Activity effect                         | Selectivity effect                                                                                              | Ref     |
|-------------------------------------|-------------------|-----------------------------------------|-----------------------------------------------------------------------------------------------------------------|---------|
| D105A                               | loss of stability | loss of activity                        | none                                                                                                            | [1,6]   |
| Y154F                               |                   | loss of activity                        |                                                                                                                 |         |
| Y235F                               |                   | loss of activity                        |                                                                                                                 |         |
| Y154F/Y235F                         |                   | loss of activity                        |                                                                                                                 |         |
| H300A or H300Q                      |                   | loss of activity                        |                                                                                                                 |         |
| H300N                               |                   | some activity for R,R-TSO               |                                                                                                                 |         |
| E35Q/H300N                          | loss of stability | some activity for R,R-TSO               | none                                                                                                            | [6]     |
| Y149F                               | loss of stability | decreased activity                      | decrease for R,R-TSO; comparable with WT for S,S-TSO                                                            | [2]     |
| H153F                               |                   |                                         |                                                                                                                 |         |
| Y149F/H153F                         |                   |                                         |                                                                                                                 |         |
| K179Q                               | loss of stability | increased activity towards R-enantiomer | none                                                                                                            | [3]     |
| E215Q                               |                   | increased activity towards R-enantiomer | loss of regioselectivity; very promiscuous                                                                      |         |
| R236K or R236Q                      |                   | increased activity towards S-enantiomer | higher discrimination favouring C-1 attack                                                                      |         |
| F33V or F33Y                        | no data           | no data                                 | none                                                                                                            | [4]     |
| W106F/L109I or W106F/L109V          |                   |                                         | higher discrimination favouring S-enantiomer                                                                    |         |
| V141K                               |                   |                                         | lower discrimination favouring S-enantiomer                                                                     |         |
| V141K/I155V                         |                   |                                         | higher discrimination favouring R-enantiomer                                                                    |         |
| W106L/L109Y/V141K/I155V             |                   |                                         |                                                                                                                 |         |
| V141T or V141Q                      |                   |                                         |                                                                                                                 |         |
| V141T/L145I or V141T/L145T          |                   |                                         |                                                                                                                 |         |
| I180L/F189C                         |                   |                                         | lower discrimination favouring S-enantiomer                                                                     |         |
| I180V                               |                   |                                         |                                                                                                                 |         |
| F189I or F189V                      |                   |                                         |                                                                                                                 |         |
| V141Q/I155L                         |                   |                                         | none                                                                                                            |         |
| I180L                               |                   |                                         |                                                                                                                 |         |
| I180C/F189V                         |                   |                                         |                                                                                                                 |         |
| W106Y/L109I/I180F                   | no data           | no data                                 | shifted preference on attack on C-1 in R-SO and on C-2 in R,R-enantiomer of <i>trans</i> -2-methylstyrene oxide | [5]     |
| W106Y/L109I/L145R/I155Y             |                   |                                         |                                                                                                                 |         |
| W106Y/L109I                         |                   |                                         |                                                                                                                 |         |
| V141K/I155V                         |                   |                                         | shifted preference on attack on C-2 in S-SO and on C-2 in S,S-enantiomer of <i>trans</i> -2-methylstyrene oxide | [5,7]   |
| W106L/L109Y/V141K/I155V             |                   |                                         | shifted preference on attack on C-1 in S-enantiomer                                                             | [5,7,8] |
| W106L/L109Y/I155V                   |                   |                                         | (2,3-epoxypropyl)benzene and on C-2 in R,R-enantiomer of <i>trans</i> -2-methylstyrene oxide                    | [5]     |
| W106L/L109Y/V141K/I155V/F189L       |                   |                                         |                                                                                                                 |         |
| W106L/L109Y/V141K/I155V/F189L/L266F |                   |                                         | shifted preference on attack on C-1 in R-SO                                                                     | [5,7]   |
| W106L/L109Y/V141K/I155V/F189L/L266G |                   |                                         | shifted preference on attack on C-2 in R,R-enantiomer of <i>trans</i> -2-methylstyrene oxide                    | [5]     |

- Elfström L.T., Widersten M. 2005 Catalysis of potato epoxide hydrolase, StEH1. Biochem J. 390:633-640.
- Thomaeus A., Naworyta A., Mowbray S.L., Widersten M. 2008. Removal of distal protein–water hydrogen bonds in a plant epoxide hydrolase increases catalytic turnover but decreases thermostability. Protein Sci. 17(7): 1275–1284.
- Lindberg D., Ahmad S., Widersten M. 2010. Mutations in salt-bridging residues at the interface of the core and lid domains of epoxide hydrolase StEH1 affect regioselectivity, protein stability and hysteresis. Archives of Biochemistry and Biophysics 495: 165–173.
- Gurell, A., Widersten, M. 2010. Modification of Substrate Specificity Resulting in an Epoxide Hydrolase with Shifted Enantiopreference for (2,3-Epoxypropyl)benzene. ChemBioChem, 11(10), 1422–1429.
- Carlsson Å.J., Bauer P., Ma H., Widersten M. 2012. Obtaining optical purity for product diols in enzyme-catalyzed epoxide hydrolysis: contributions from changes in both enantio- and regioselectivity. Biochemistry. 25;51(38):7627-37.
- Amrein B.A., Bauer P., Duarte F., Janfalk Carlsson Å., Naworyta A., Mowbray S.L., Widersten M., Kamerlin S.C.L. 2015. Expanding the Catalytic Triad in Epoxide Hydrolases and Related Enzymes. ACS Catal., 5 (10): 5702–5713.
- Janfalk Carlsson Å., Bauer P., Dobritzsch D., Nilsson M., Kamerlin S.C.L., Widersten M. 2016. Laboratory-Evolved Enzymes Provide Snapshots of the Development of Enantioconvergence in Enzyme-Catalyzed Epoxide Hydrolysis. ChemBioChem 17: 1693 – 1697.
- Bauer P., Janfalk Carlsson Å., Amrein B. A., Dobritzsch D., Widersten M., Kamerlin S. C. L. 2016. Conformational diversity and enantioconvergence in potato epoxide hydrolase 1. Org Biomol Chem. 14(24): 5639–5651.
