# Supplementary material for: Exploring Solanum tuberosum Epoxide Hydrolase Internal Architecture by Water Molecules Tracking
Source: MDPI journal article supplement (doi:10.3390/biom8040143), 2018-11-12
Supplement: s1 [file s1]

| Hot-spot localization | MD1                                                         | MD2                                                                                | MD3                                              | MD4                                                   | MD5                                                                |
|-----------------------|-------------------------------------------------------------|------------------------------------------------------------------------------------|--------------------------------------------------|-------------------------------------------------------|--------------------------------------------------------------------|
| TC/M entry            | <b>H153, P188, L266, I270</b>                               | P186, A187, <b>P188, L266, I270</b>                                                | <b>P188, L266, I270</b>                          | <b>Y149, P188, I270</b>                               | <b>Y149, P186, A187, P188, H269, I270</b>                          |
| TM2 entry             |                                                             | L116, F132, W248, A251                                                             |                                                  |                                                       | R135, T249                                                         |
| cavity I              |                                                             | T182, <b>Y183, R184, A299, H300*, F301</b>                                         | <b>Y183, R184, D185, F264, L266, A299, H300*</b> | <b>Y183, R184, A299, H300*, F301</b>                  | <b>I180, Y183, R184, D185, F189, F264, L266, A299, H300*, F301</b> |
| cavity II             |                                                             | <b>F33, E35*, D105*, H300*, F301</b>                                               |                                                  | <b>F33, E35*, H300*, F301</b>                         | <b>E35*, D105*, H230</b>                                           |
| funnel interior       | <b>L109, V130, H131, F132, S133, L238, N241, W242, V267</b> | I78, <b>L109, H113, V130, H131, F132, S133, N140, V141, L238, N241, W242, T245</b> | <b>L109, V130, V141, L238, N241, W242</b>        | <b>L109, V130, H131, S133, R135, N241, T245, W248</b> | <b>L109, V130, H131, F132, S133</b>                                |
