# Supplementary material for: Exploring Solanum tuberosum Epoxide Hydrolase Internal Architecture by Water Molecules Tracking
Source: MDPI journal article supplement (doi:10.3390/biom8040143), 2018-11-12
Supplement: s1 [file s1]

| MD | Entry | Exit | Tunnel ID<br>(CAVER) | Residues at<br>outliers' exit         | Outliers'<br>exit | No of<br>events | Visited<br>cavity | Total<br>[ps] | Inp<br>[ps] | Obj<br>[ps] | Out<br>[ps] |
|----|-------|------|----------------------|---------------------------------------|-------------------|-----------------|-------------------|---------------|-------------|-------------|-------------|
| 1  | TM1   | O    | 12                   | F168, A169, V176,<br>F228             | III               | 1               | III               | 636           | 27          | 273         | 330         |
| 2  | TM1   | O    | 11                   | Y190, A199                            | II                | 1               | III               | 619           | 18          | 537         | 64          |
| 2  | O     | TM1  | 8                    | E165, F168, A169,<br>G172, A173, E224 | III               | 2               | III               | 2206<br>2464  | 526<br>798  | 1138<br>958 | 542<br>708  |
| 2  | O     | N    | 14                   | K178, T182, A203,<br>V205, S208       | II                | 1               | I                 | 27707         | 25485       | 2222        | N           |
| 3  | TM1   | O    | 16                   | T182, R184, A203,<br>P204, L207, S208 | II                | 1               | I                 | 22547         | 1513        | 3439        | 17595       |
| 5  | O     | TM1  | n.i.                 | R41, W210, L211,<br>S212, E215, Q304  | I                 | 1               | -                 | 17423         | 15226       | 531         | 1664        |
| 5  | O     | N    | n.i.                 | R41, L211, S212,<br>E215              | I                 | 1               | -                 | 19915         | 14666       | 5249        | N           |
