# Supplementary material for: Exploring Solanum tuberosum Epoxide Hydrolase Internal Architecture by Water Molecules Tracking
Source: MDPI journal article supplement (doi:10.3390/biom8040143), 2018-11-12
Supplement: s1 [file s1]

| 1 <sup>st</sup> MD simulation |         |           |        | 2 <sup>nd</sup> MD simulation |         |           |        | 3 <sup>rd</sup> MD simulation |         |           |        | 4 <sup>th</sup> MD simulation |         |           |        | 5 <sup>th</sup> MD simulation |         |           |        |
|-------------------------------|---------|-----------|--------|-------------------------------|---------|-----------|--------|-------------------------------|---------|-----------|--------|-------------------------------|---------|-----------|--------|-------------------------------|---------|-----------|--------|
| C ID                          | Occ [%] | AB [Å]    | MB [Å] | C ID                          | Occ [%] | AB [Å]    | MB [Å] | C ID                          | Occ [%] | AB [Å]    | MB [Å] | C ID                          | Occ [%] | AB [Å]    | MB [Å] | C ID                          | Occ [%] | AB [Å]    | MB [Å] |
| 1                             | 100     | 1.9 ± 0.4 | 3.1    | 1                             | 100     | 2.0 ± 0.4 | 2.9    | 1                             | 100     | 1.9 ± 0.4 | 2.9    | 1                             | 100     | 1.9 ± 0.4 | 3.0    | 1                             | 100     | 2.0 ± 0.4 | 3.0    |
| 2                             | 86      | 1.7 ± 0.3 | 2.7    | 2                             | 92      | 1.2 ± 0.2 | 1.9    | 2                             | 92      | 1.7 ± 0.3 | 2.8    | 2                             | 97      | 1.3 ± 0.2 | 2.0    | 2                             | 85      | 1.2 ± 0.2 | 2.1    |
| 3                             | 98      | 1.3 ± 0.2 | 2.1    | 3                             | 69      | 1.3 ± 0.3 | 2.6    | 3                             | 97      | 1.2 ± 0.2 | 2.0    | 3                             | 70      | 1.3 ± 0.3 | 2.7    | 3                             | 70      | 1.4 ± 0.3 | 2.7    |
| 4                             | 65      | 1.3 ± 0.2 | 2.5    | 4                             | 30      | 1.2 ± 0.2 | 2.0    | 4                             | 47      | 1.2 ± 0.2 | 2.4    | 4                             | 41      | 1.2 ± 0.2 | 2.0    | 4                             | 30      | 1.1 ± 0.2 | 2.0    |
| 5                             | 47      | 1.2 ± 0.2 | 2.5    | 5                             | 27      | 1.0 ± 0.1 | 1.7    | 5                             | 33      | 1.2 ± 0.2 | 2.6    | 6                             | 24      | 1.0 ± 0.1 | 1.4    | 5                             | 47      | 1.2 ± 0.2 | 2.5    |
| 6                             | 21      | 1.0 ± 0.2 | 2.0    |                               |         |           |        | 6                             | 50      | 1.0 ± 0.1 | 1.4    | 7                             | 23      | 1.0 ± 0.1 | 1.3    | 6                             | 23      | 1.0 ± 0.1 | 1.5    |
| 7                             | 28      | 1.0 ± 0.1 | 1.4    |                               |         |           |        | 7                             | 20      | 1.0 ± 0.1 | 1.8    | 8                             | 21      | 1.0 ± 0.1 | 1.4    |                               |         |           |        |
|                               |         |           |        |                               |         |           |        |                               |         |           |        | 9                             | 22      | 1.0 ± 0.1 | 1.4    |                               |         |           |        |
|                               |         |           |        |                               |         |           |        |                               |         |           |        | 10                            | 20      | 1.0 ± 0.1 | 1.3    |                               |         |           |        |
