# Supplementary material for: Exploring Solanum tuberosum Epoxide Hydrolase Internal Architecture by Water Molecules Tracking
Source: MDPI journal article supplement (doi:10.3390/biom8040143), 2018-11-12
Supplement: s1 [file s1]

| ID       | IN-OUT       | p(IN-OUT) | DIF          | p(DIF) | N          | p(N) |
|----------|--------------|-----------|--------------|--------|------------|------|
| TM1      | $858 \pm 87$ | 0.84      | $137 \pm 32$ | 0.13   | $41 \pm 6$ | 0.04 |
| TC/M     | $9 \pm 4$    | 0.06      | $118 \pm 16$ | 0.91   | $3 \pm 1$  | 0.02 |
| TM2      | $<1 \pm 1$   | 0.01      | $21 \pm 24$  | 0.97   | $<1 \pm 1$ | 0.02 |
| outliers | 0            | 0.00      | $2 \pm 1$    | 0.75   | $1 \pm 1$  | 0.25 |
