# Supplementary material for: Exploring Solanum tuberosum Epoxide Hydrolase Internal Architecture by Water Molecules Tracking
Source: MDPI journal article supplement (doi:10.3390/biom8040143), 2018-11-12
Supplement: s1 [file s1]

| Residue | Entropy score | Position of residue |
|---------|---------------|---------------------|
| E35     | 0.28          | active site         |
| L109    | 0.74          | funnel              |
| V130    | 0.63          | funnel              |
| H131    | 0.20          | funnel              |
| F132    | 0.56          | funnel              |
| S133    | 0.72          | funnel              |
| Y183    | 0.79          | cavity I            |
| R184    | 0.83          | cavity I            |
| P188    | 0.68          | TC/M                |
| L238    | 0.73          | funnel              |
| N241    | 0.73          | funnel              |
| W242    | 0.66          | funnel              |
| L266    | 0.83          | TC/M                |
| I270    | 0.85          | TC/M                |
| A299    | 0.48          | cavity I            |
| H300    | 0.13          | active site         |
| F301    | 0.35          | cavity I            |
