# Supplementary material for: Exploring Solanum tuberosum Epoxide Hydrolase Internal Architecture by Water Molecules Tracking
Source: Biomolecules. 2018 Nov 12;8(4):143. doi: 10.3390/biom8040143 (PMC6315908; doi:10.3390/biom8040143)
Supplement: Supplementary file 1 [file biomolecules-08-00143-s001.zip]

Archive with 29 entries (29 files):
- Table_S8.pdf
- Figure_S1.doc
- Figure_S1.pdf
- Figure_S2.doc
- Figure_S2.pdf
- Figure_S3.doc
- Figure_S3.pdf
- Figure_S4.doc
- Figure_S4.pdf
- Figure_S5.doc
- Figure_S5.pdf
- Figure_S6.doc
- Figure_S6.pdf
- Supplementary captions.doc
- Table_S1.doc
- Table_S1.pdf
- Table_S2.doc
- Table_S2.pdf
- Table_S3.doc
- Table_S3.pdf
- Table_S4.doc
- Table_S4.pdf
- Table_S5.doc
- Table_S5.pdf
- Table_S6.doc
- Table_S6.pdf
- Table_S7.doc
- Table_S7.pdf
- Table_S8.doc
