# Supplementary figures and images for: Exploring Solanum tuberosum Epoxide Hydrolase Internal Architecture by Water Molecules Tracking
Source: MDPI journal article supplement (doi:10.3390/biom8040143), 2018-11-12

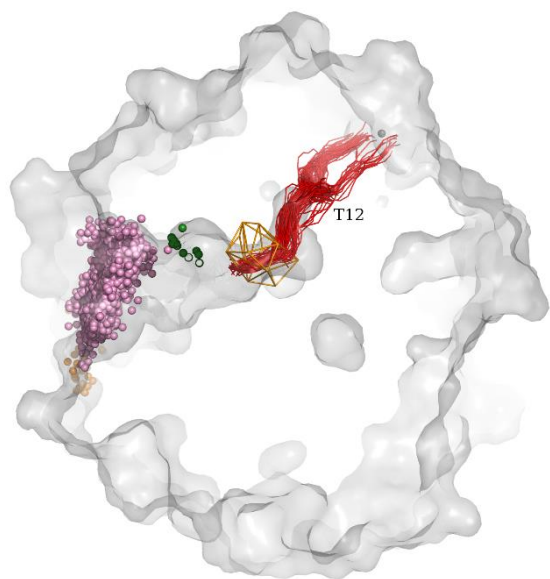

a)

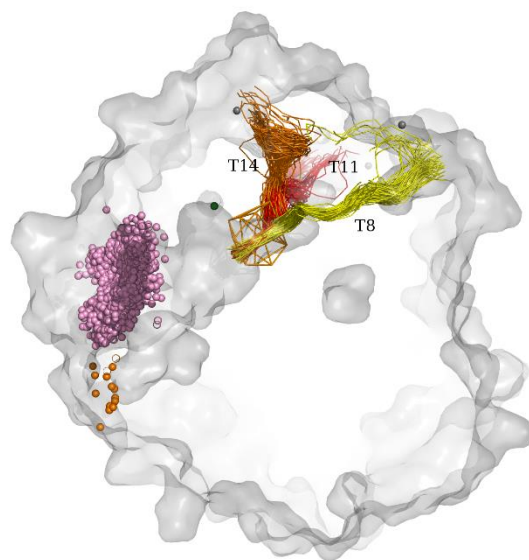

b)

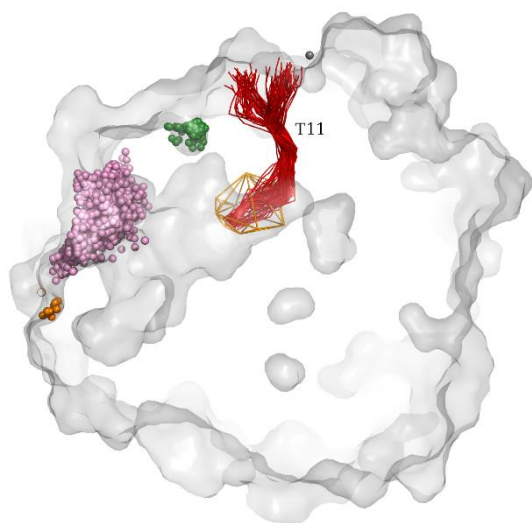

c)

Supplement: s1 [file s1]

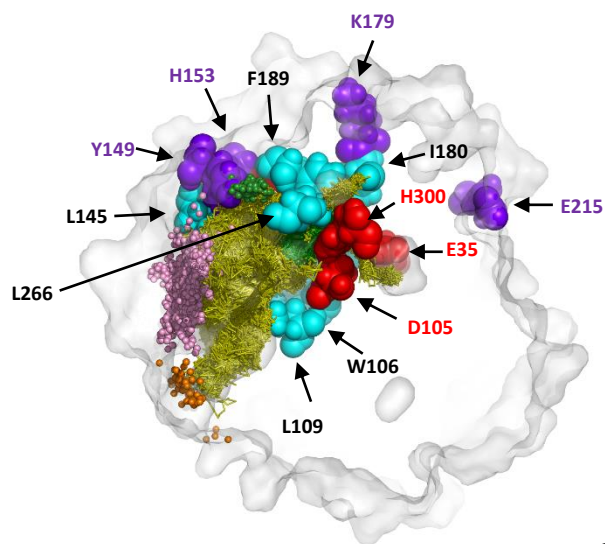

a)

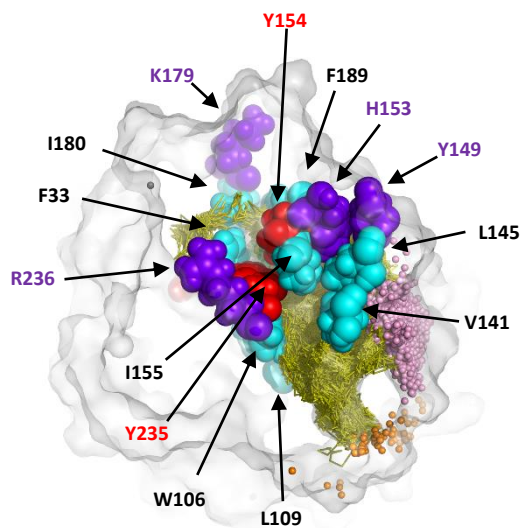

b)

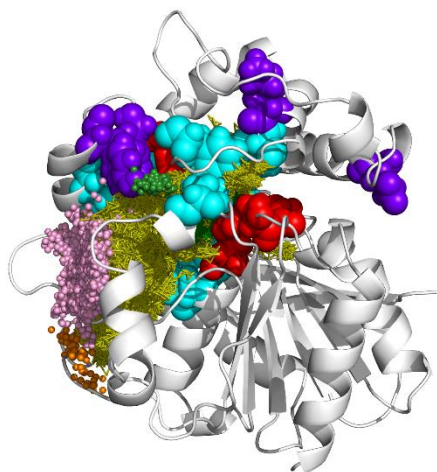

c)

Supplement: s1 [file s1]

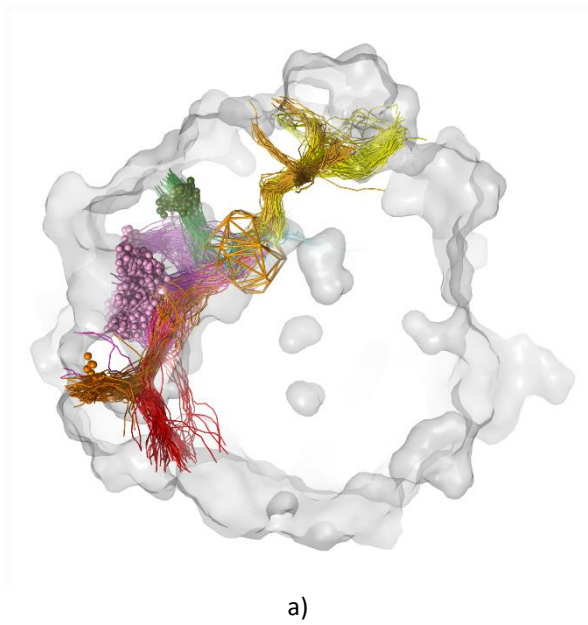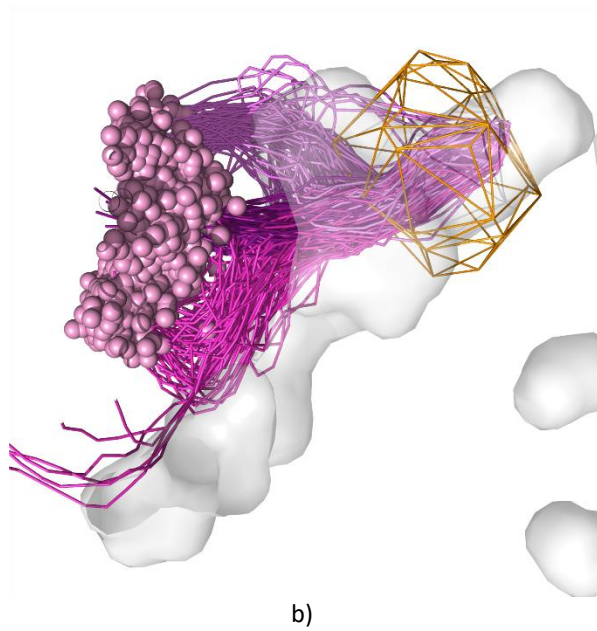

Supplement: s1 [file s1]

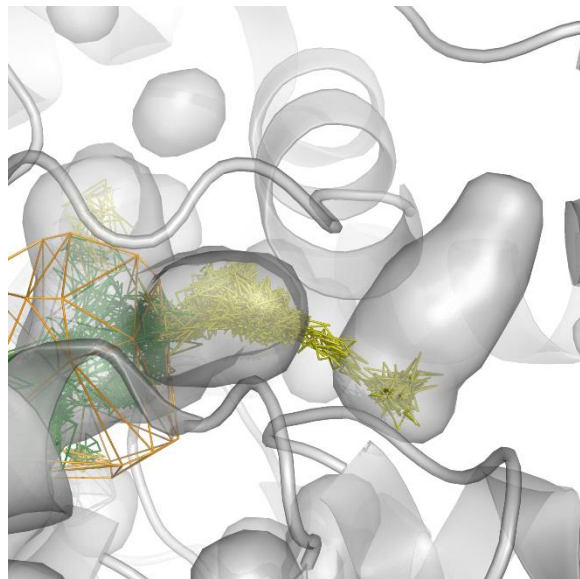

a)

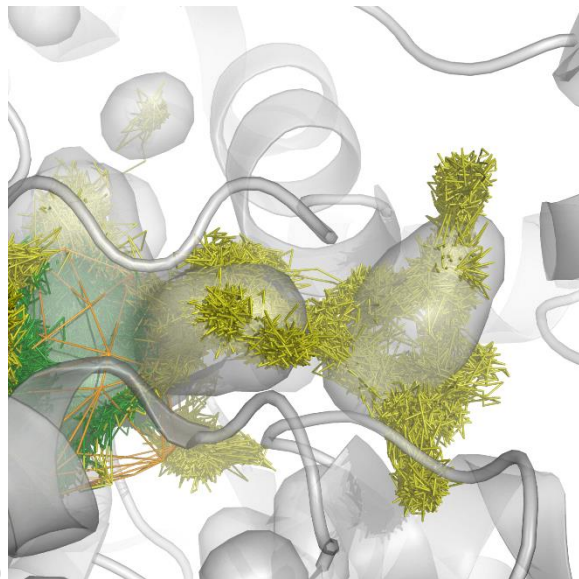

b)

Supplement: s1 [file s1]

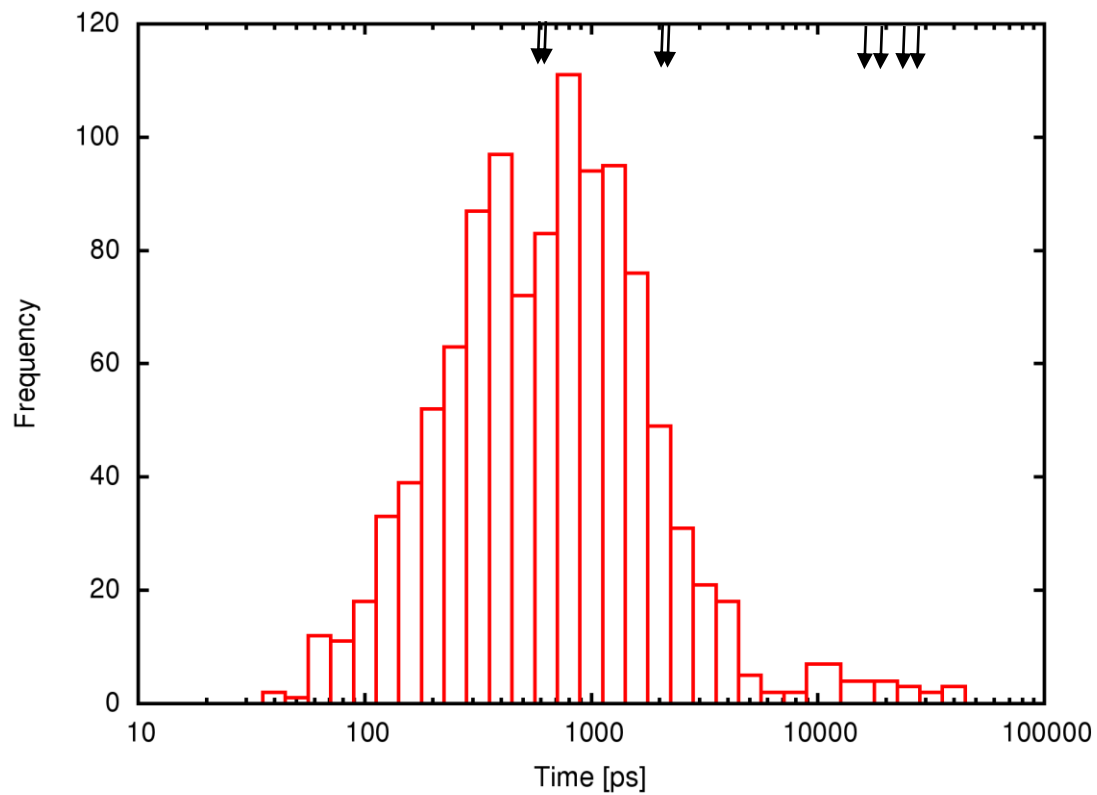

Supplement: s1 [file s1]

RMSD backbone

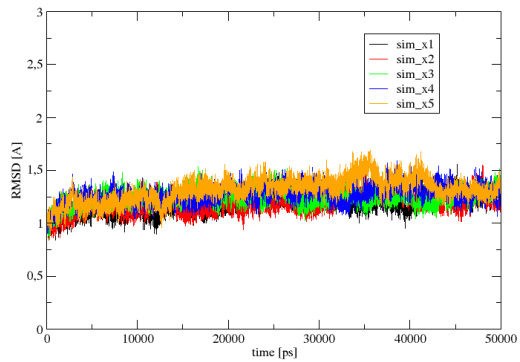

a)

RMSF CA

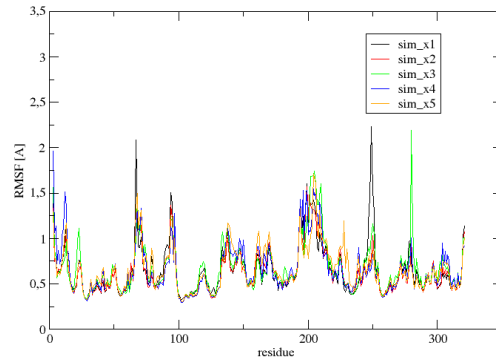

b)

Supplement: s1 [file s1]
